# Supplementary material for: Photocatalytic H2O2 production over photocatalysts prepared by phosphine-protected Au101 nanoparticles on WO3
Source: Royal Society of Chemistry journal article supplement (doi:10.1039/d4cy00237g), 2024-01-01
Supplement: d4cy00237g1.pdf [file d4cy00237g1.pdf]

## Supplementary Information

---

### Photocatalytic H<sub>2</sub>O<sub>2</sub> Production Over Photocatalysts Prepared By Phosphine-protected Au<sub>101</sub> Nanoclusters on WO<sub>3</sub>

*Imran Hakim Abd Rahim,<sup>1</sup> Xuan Yin Lee,<sup>1</sup> Abdulrahman S. Alotabi,<sup>2,3</sup> D. J. Osborn,<sup>4</sup> Sunita Gautam Adhikari,<sup>2</sup> Gunther G. Andersson,<sup>2</sup> Gregory F. Metha,<sup>4</sup> Rohul H. Adnan<sup>1\*</sup>*

1. Nanoscience Lab, Faculty of Science, Universiti Teknologi Malaysia, 81310 Johor Bahru, Malaysia
2. Flinders Institute for NanoScale Science and Technology, Flinders University, Adelaide, SA 5042, Australia
3. Department of Physics, Faculty of Science and Arts in Baljurashi, Albaha University, Baljurashi 65655, Saudi Arabia
4. Department of Chemistry, University of Adelaide, Adelaide, SA 5005, Australia

\*Corresponding author: [rohuladnan@gmail.com](mailto:rohuladnan@gmail.com)

---

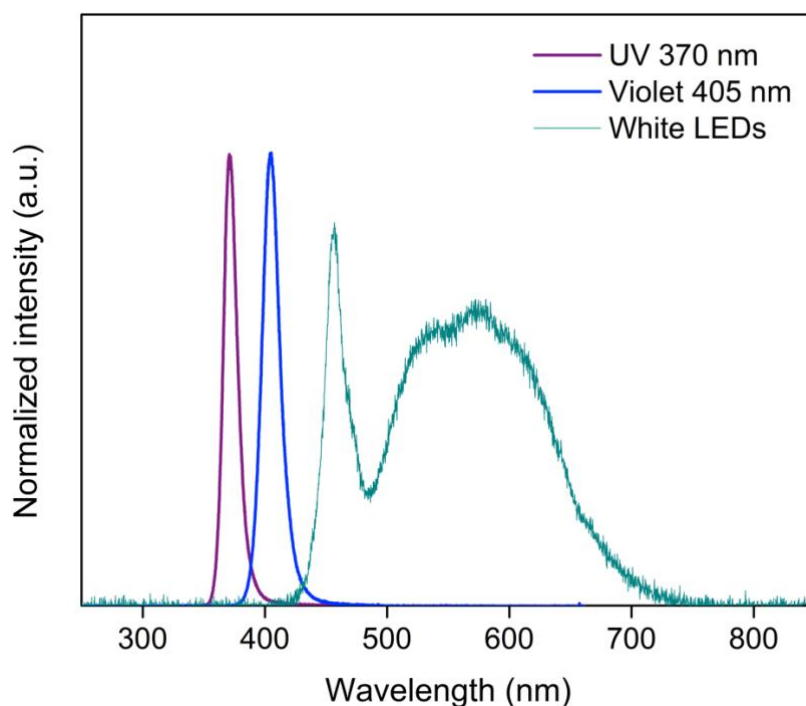

**Fig. S1.** Emission profile of 370 nm and 405 nm LED lamps used in this work

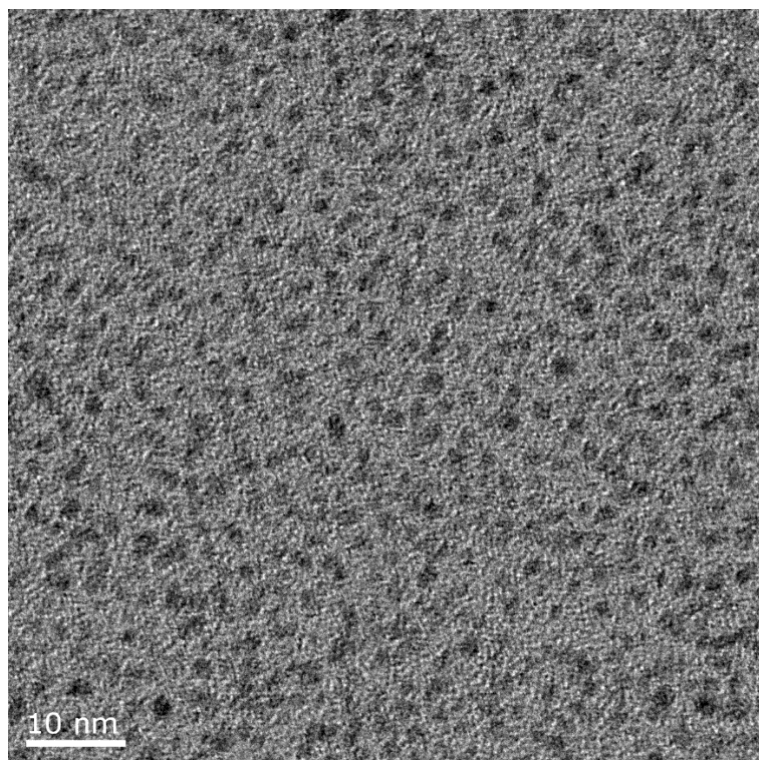

Fig. S2. HRTEM image of pristine Au<sub>101</sub> clusters dissolved in DCM.

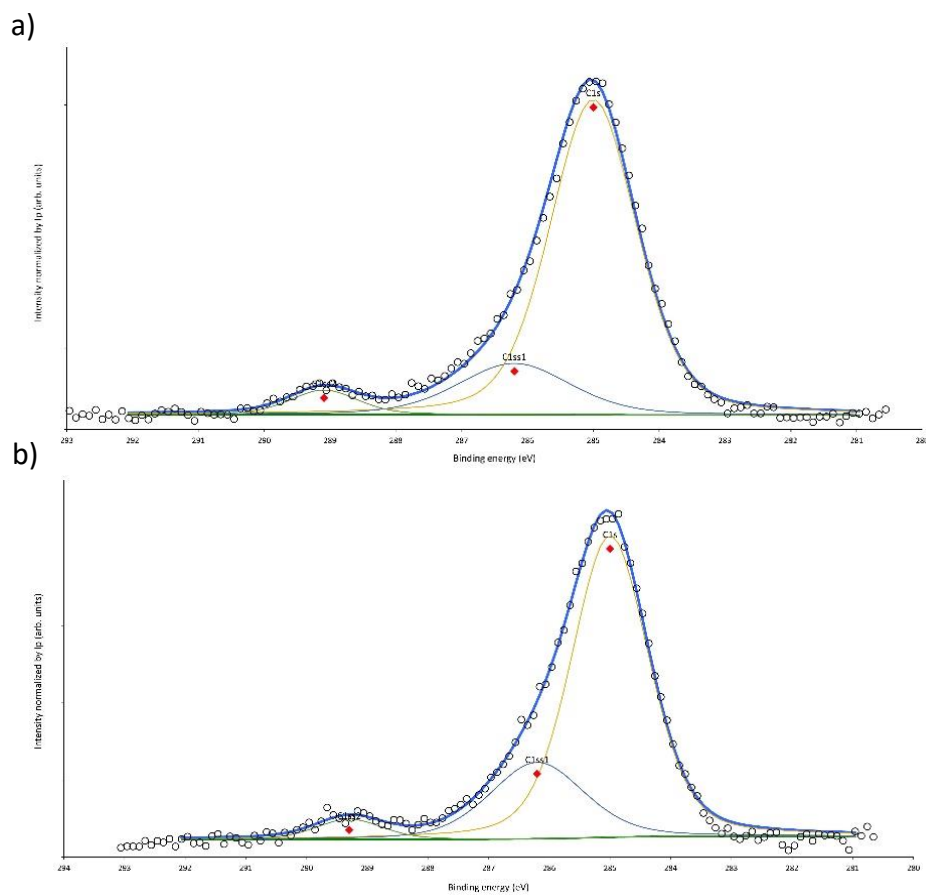

Fig. S3. C1s spectra of a) uncalcined, and b) calcined Au<sub>101</sub>/WO<sub>3</sub> photocatalysts.

**Table S1.** Peak element and percentage composition of WO<sub>3</sub>-based photocatalysts

|                                | Element              | Peak position<br>(± 0.2eV)        | WO <sub>3</sub>                               | Au <sub>101</sub> /WO <sub>3</sub>                  | Au <sub>101</sub> /WO <sub>3</sub><br>calcined      |
|--------------------------------|----------------------|-----------------------------------|-----------------------------------------------|-----------------------------------------------------|-----------------------------------------------------|
| Before photocatalytic reaction | C 1s                 | P1 - (285)                        | 13.9                                          | 20.2                                                | 14.3                                                |
|                                |                      | P2 - (286.2)                      | 5.5                                           | 5.4                                                 | 6.0                                                 |
|                                |                      | P3 - (289.2)                      | 1.1                                           | 1.3                                                 | 0.9                                                 |
|                                | O 1s                 | P1 - (530.5)                      | 52.5                                          | 49.5                                                | 56.3                                                |
|                                |                      | P2 - (531.5)                      | 11.0                                          | 7.2                                                 | 7.3                                                 |
|                                | Au 4f <sub>7/2</sub> | P1 - (84.2)                       | -                                             | 0.36                                                | 0.24                                                |
|                                | P 2p <sub>3/2</sub>  | P1 - 131.8 (Au-PPh <sub>3</sub> ) | -                                             | 0.22                                                | -                                                   |
|                                |                      | P2 - 132.7 (O= PPh <sub>3</sub> ) | -                                             | -                                                   | 0.14                                                |
| W 4f <sub>7/2</sub>            | P1 (35.7-35.9)       | 16.0                              | 14.9                                          | 14.9                                                |                                                     |
|                                |                      |                                   | <b>Au<sub>101</sub>/WO<sub>3</sub><br/>1h</b> | <b>Au<sub>101</sub>/WO<sub>3</sub><br/>calc. 1h</b> | <b>Au<sub>101</sub>/WO<sub>3</sub><br/>calc. 3h</b> |
| After photocatalytic reaction  | C 1s                 | P1 - (285)                        | 9.7                                           | 14.1                                                | 10.2                                                |
|                                |                      | P2 - (286.2)                      | 14.4                                          | 6.3                                                 | 6.9                                                 |
|                                |                      | P3 - (289.2)                      | 1.4                                           | 1.2                                                 | 1.4                                                 |
|                                | O 1s                 | P1 - (530.5)                      | 47.0                                          | 51.5                                                | 56.6                                                |
|                                |                      | P2 - (531.5)                      | 13.9                                          | 11.8                                                | 10.1                                                |
|                                | Au 4f <sub>7/2</sub> | P1 - (84.2)                       | 0.26                                          | 0.17                                                | 0.16                                                |
|                                | P 2p <sub>3/2</sub>  | P1 - 131.8 (PPh <sub>3</sub> )    | 0                                             | 0                                                   | 0                                                   |
|                                |                      | P2 - 132.7 (O= PPh <sub>3</sub> ) | 0                                             | 0                                                   | 0                                                   |
| W 4f <sub>7/2</sub>            | P1 (35.7-35.9)       | 13.4                              | 15.0                                          | 14.6                                                |                                                     |

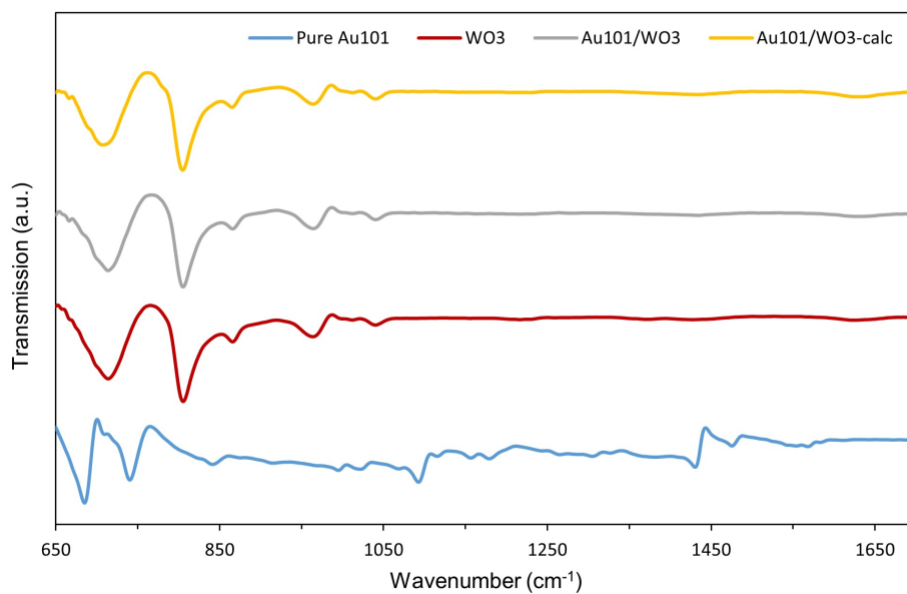

**Fig. S4.** FTIR spectra of pure Au<sub>101</sub> clusters, WO<sub>3</sub>, uncalcined and calcined Au<sub>101</sub>/WO<sub>3</sub>.

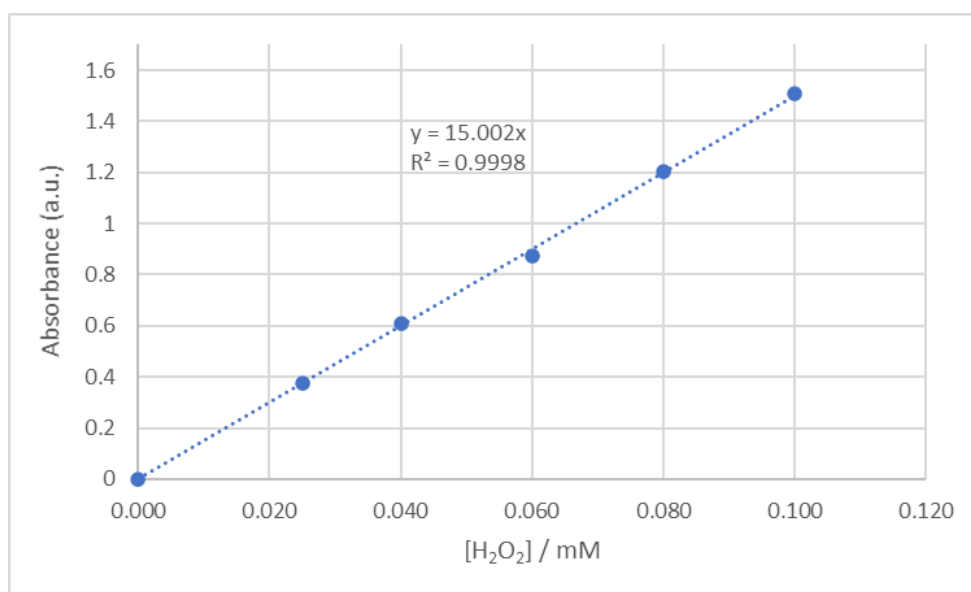

**Fig. S5.** Calibration curve of standard H<sub>2</sub>O<sub>2</sub> solutions monitored at 454 nm by UV-vis spectroscopy.

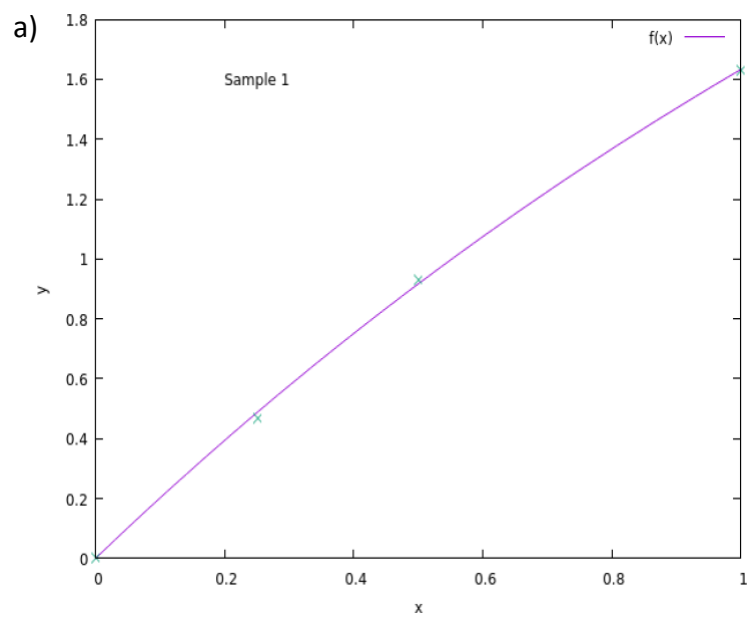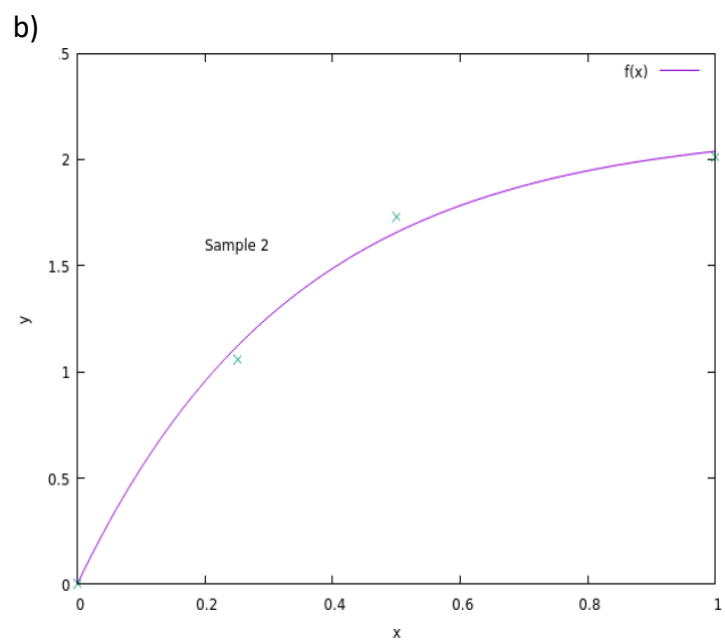

**Fig. S6.** Curve fitting using GNU Plot software for a) Sample 1 ( $\text{Au}_{101}/\text{WO}_3$ ), and b) Sample 2 ( $\text{Au}_{101}/\text{WO}_3$ -calcined)

**Table S2.** Comparison of photocatalytic activity in H<sub>2</sub>O<sub>2</sub> production of Au-based photocatalysts

| Photocatalyst                                                | Light source | Reaction mixture                  | [H <sub>2</sub> O <sub>2</sub> ] (mM) | Time (h) | Ref.         |
|--------------------------------------------------------------|--------------|-----------------------------------|---------------------------------------|----------|--------------|
| 0.25% Au <sub>101</sub> /WO <sub>3</sub><br>calcined         | 365 nm       | 4% EtOH/H <sub>2</sub> O          | 2.05                                  | 1        | This<br>work |
|                                                              |              | water                             | 0.31                                  | 0.5      |              |
| 0.25% Au/TiO <sub>2</sub>                                    | >300 nm      | 4% EtOH/H <sub>2</sub> O          | ~7                                    | 24       | 1            |
| 0.88% Au/TiO <sub>2</sub> -<br>CO <sub>3</sub> <sup>2-</sup> | >430 nm      | 4% HCOOH/H <sub>2</sub> O         | 1 mM                                  | 1        | 2            |
| 0.61% Au/TiO <sub>2</sub>                                    | >320 nm      | 4% MeOH/H <sub>2</sub> O,<br>pH 9 | 1.31                                  | 10       | 3            |
| 0.34% Au/WO <sub>3</sub>                                     | >420 nm      | 4% MeOH/H <sub>2</sub> O          | 0.54                                  | 5        | 4            |
|                                                              |              | water                             | 0.18                                  | 5        |              |

## References

1. Teranishi, M.; Naya, S.; Tada, H. In Situ Liquid Phase Synthesis of Hydrogen Peroxide from Molecular Oxygen Using Gold Nanoparticle-Loaded Titanium(IV) Dioxide Photocatalyst. *J. Am. Chem. Soc.* 2010, 132 (23), 7850–7851.
2. Naya, S.; Niwa, T.; Kume, T.; Tada, H. Visible-Light-Induced Electron Transport from Small to Large Nanoparticles in Bimodal Gold Nanoparticle-Loaded Titanium(IV) Oxide. *Angewandte Chemie International Edition* 2014, 53 (28), 7305–7309.
3. Xiong, X.; Zhang, X.; Liu, S.; Zhao, J.; Xu, Y. Sustained Production of H<sub>2</sub>O<sub>2</sub> in Alkaline Water Solution Using Borate and Phosphate-Modified Au/TiO<sub>2</sub> Photocatalysts. *Photochemical & Photobiological Sciences* 2018, 17 (8), 1018–1022.
4. Wang, Y.; Wang, Y.; Zhao, J.; Chen, M.; Huang, X.; Xu, Y. Efficient Production of H<sub>2</sub>O<sub>2</sub> on Au/WO<sub>3</sub> under Visible Light and the Influencing Factors. *Applied Catalysis B: Environmental* 2021, 284, 119691
